# Supplementary material for: Using induced pluripotent stem cells to investigate human neuronal phenotypes in 1q21.1 deletion and duplication syndrome
Source: PubMed Central journal article supplement (PMC9054650; doi:10.1038/s41380-021-01182-2), 2021-06-10
Supplement: 41380_2021_1182_MOESM2_ESM.pdf [file 41380_2021_1182_MOESM2_ESM.pdf]

## Pluripotency ICC

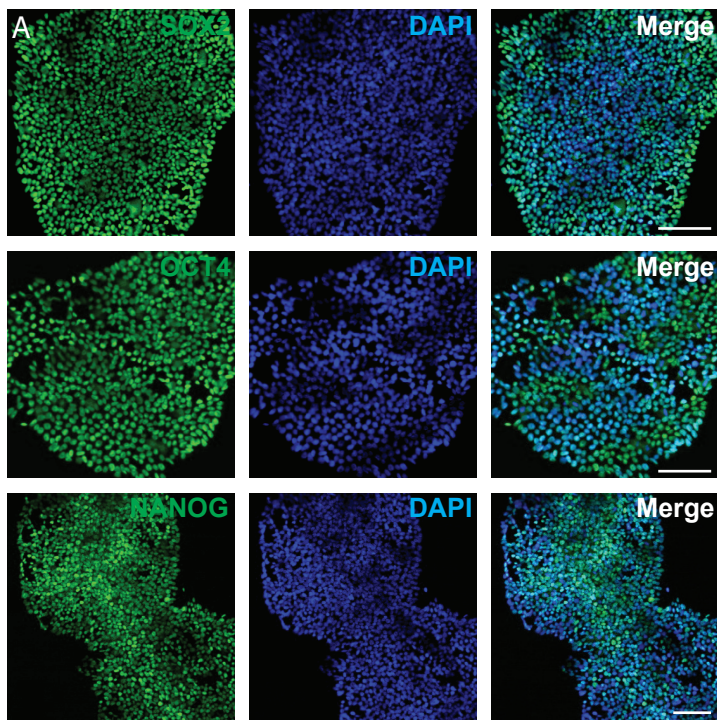

## Reprogramming Gene Expression

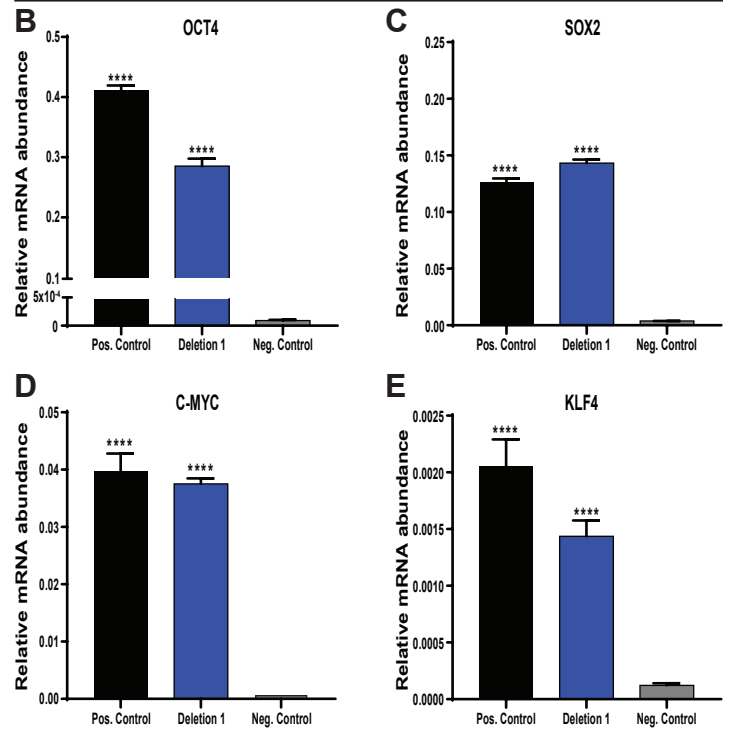

## Trilineage Differentiation

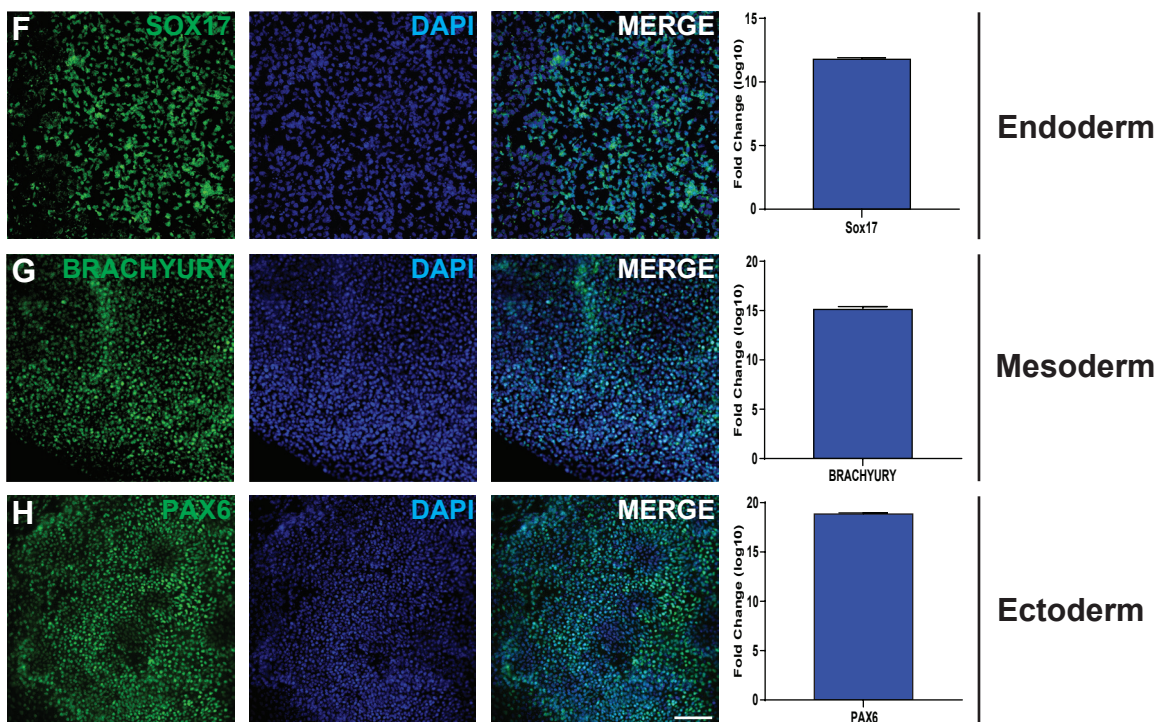

**Suppl. Fig. 1: Characterization of iPSCs generated from 1q21.1 deletion patient 1.** **A** Representative images of iPSCs stained for 3 markers of pluripotency (SOX2, OCT4 and NANOG). **B** Expression of OCT4 in iPSCs generated from 1q21.1 deletion patient 1 as compared to a positive control (hESCs) and a negative control (control iPSC derived neurons). **C** Expression of SOX2 in iPSCs generated from 1q21.1 deletion patient 1 as compared to a positive control (hESCs) and a negative control (control iPSC derived neurons). **D** Expression of C-MYC in iPSCs generated from 1q21.1 deletion patient 1 as compared to a positive control (hESCs) and a negative control (control iPSC derived neurons). **E** Expression of KLF4 in iPSCs generated from 1q21.1 deletion patient 1 as compared to a positive control (hESCs) and a negative control (control iPSC derived neurons). **F** Representative images and gene expression of SOX17 in iPSCs pushed to an endoderm fate. **G** Representative images and gene expression of BRACHYURY in iPSCs pushed to a mesoderm fate. **H** Representative images and gene expression of PAX6 in iPSCs pushed to an ectoderm fate. All data is presented as mean  $\pm$  SEM, ( $n \geq 3$ ) and where appropriate data was analysed by students T-Test: \*\*\*\* $P < 0.0001$  vs negative control. Scale bar = 100 $\mu$ m.
