# Supplementary material for: Using induced pluripotent stem cells to investigate human neuronal phenotypes in 1q21.1 deletion and duplication syndrome
Source: PubMed Central journal article supplement (PMC9054650; doi:10.1038/s41380-021-01182-2), 2021-06-10
Supplement: 41380_2021_1182_MOESM9_ESM.pdf [file 41380_2021_1182_MOESM9_ESM.pdf]

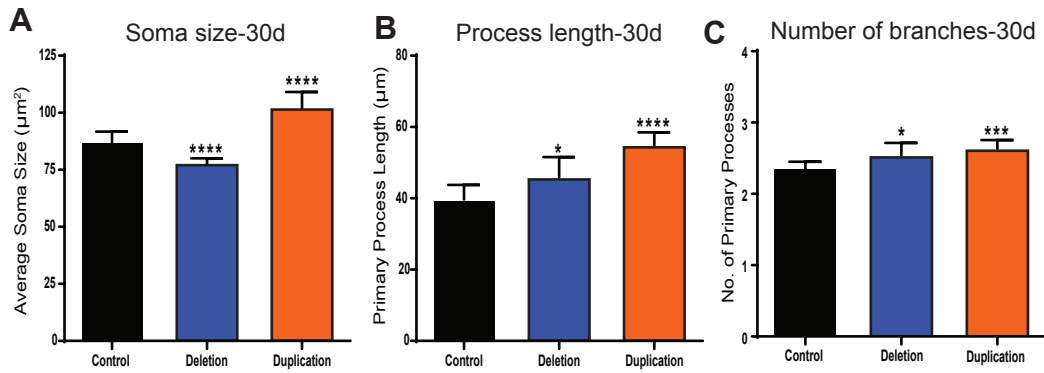

**Supp. Fig. 8: Morphological characterization of 1q21.1 immature neurons.** **A** Quantification of average soma size of neurons after 30 days of differentiation ( $n \geq 3$ ). **B** Quantification of MAP2+ process length of neurons after 30 days of differentiation ( $n \geq 3$ ). **C** Quantification of the number of primary MAP2+ branches of neurons after 30 days of differentiation ( $n \geq 3$ ). Data was analysed using Students T-Tests. All data presented as means  $\pm$  SEM \* $P < 0.05$ ; \*\*\* $P < 0.001$  \*\*\*\* $P < 0.0001$  vs. control.
