# Supplementary material for: Using induced pluripotent stem cells to investigate human neuronal phenotypes in 1q21.1 deletion and duplication syndrome
Source: PubMed Central journal article supplement (PMC9054650; doi:10.1038/s41380-021-01182-2), 2021-06-10
Supplement: 41380_2021_1182_MOESM10_ESM.pdf [file 41380_2021_1182_MOESM10_ESM.pdf]

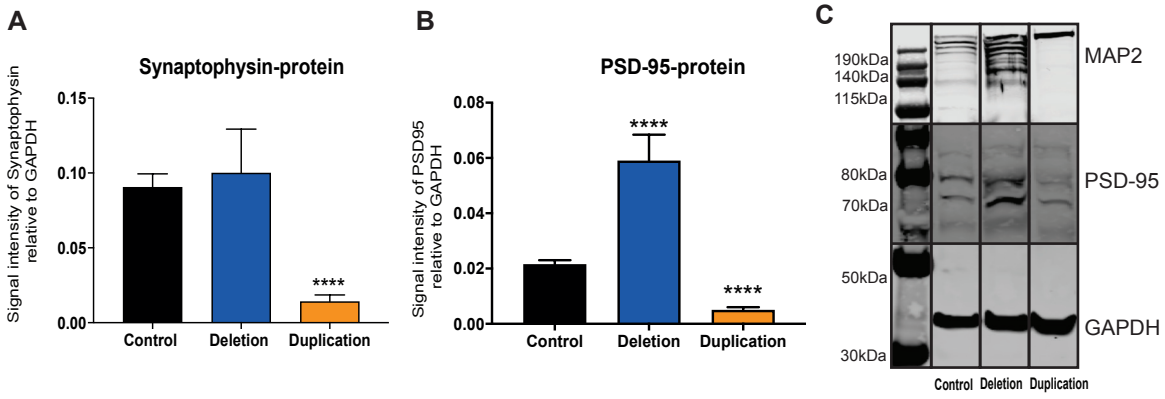

**Supp. Fig. 9: Expression of Synaptophysin and PSD-95 in iPSC derived neurons with 1q21.1 CNV. A** The expression of Synaptophysin protein at day 50 of neuronal differentiation ( $n \geq 3$ ). **B** Histogram of PSD-95 protein expression normalised to both GAPDH ( $n \geq 3$ ). Data was analyzed using Students T-Tests and all data is presented as means  $\pm$  SEM; \* $P < 0.05$ , \*\*\* $P < 0.001$ , \*\*\*\* $P < 0.0001$  vs Control. **C** Representative western blots of GAPDH, PSD-95 and MAP2 from a Control, Deletion and Duplication sample.
