# Supplementary material for: Using induced pluripotent stem cells to investigate human neuronal phenotypes in 1q21.1 deletion and duplication syndrome
Source: PubMed Central journal article supplement (PMC9054650; doi:10.1038/s41380-021-01182-2), 2021-06-10
Supplement: 41380_2021_1182_MOESM11_ESM.pdf [file 41380_2021_1182_MOESM11_ESM.pdf]

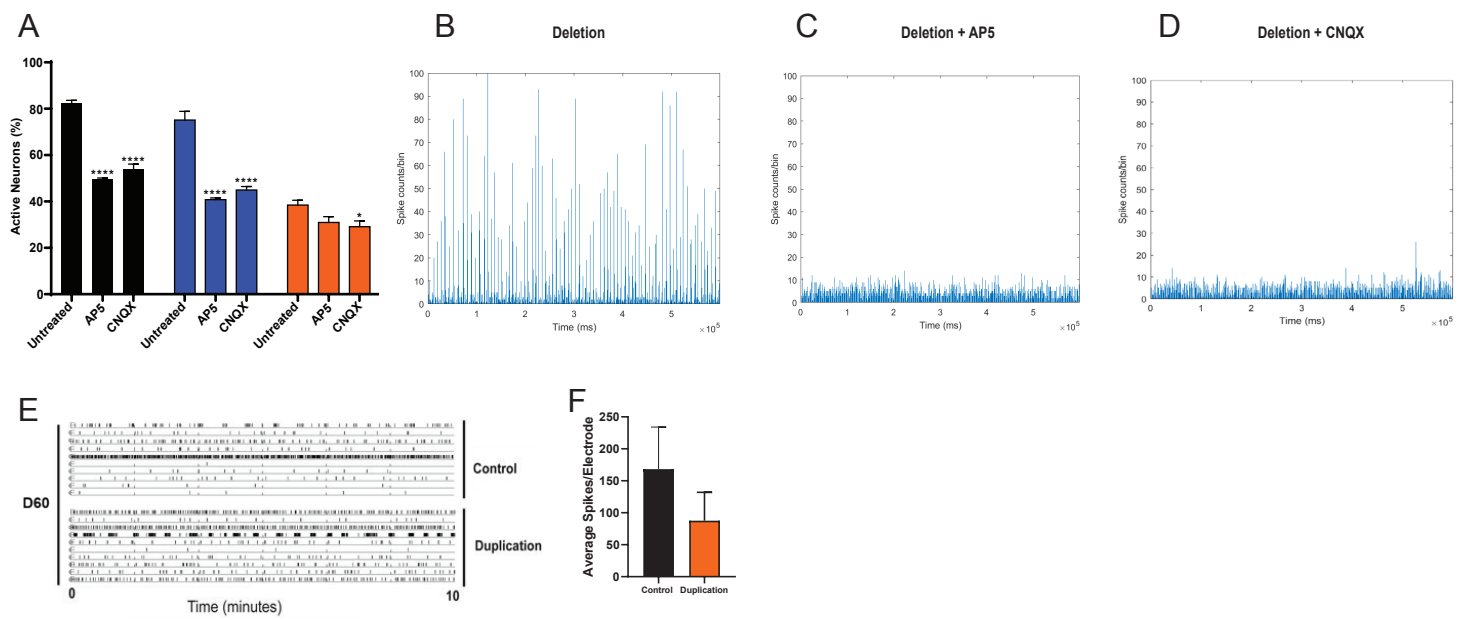

**Supp. Fig. 10: Inhibition of AMPA or NMDA signalling results in decreased neuronal function.** **A** Quantification of soma which show at least 1 characteristically neuronal calcium event ( $n \geq 3$ ). Both genotype ( $F_{2,19}=97.44$ ;  $P < 0.0001$ ;  $n \geq 3$ /group) and drug ( $F_{2,19}=100.5$ ;  $P < 0.05$ ;  $n \geq 3$ /group) had significant effects on the percentage of active cells. There was also a significant interaction between the effect of genotype and drug ( $F_{4,19}=10.16$ ;  $P = 0.0001$ ;  $n \geq 3$ /group) on the percentage of active cells. Data sets were analysed by two-way ANOVA with post hoc comparisons using Dunnett's multiple comparisons test comparing to control samples. Stars represent Dunnett-corrected post hoc tests. All data presented as means  $\pm$  SEM \* $P < 0.05$ ; \*\*\*\* $P < 0.0001$  vs. untreated. **B** Example of an array-wide spike detection rate (ASDR) plot from 1q21.1 deletion cultures after 100 days of differentiation. **C** Example of an array-wide spike detection rate (ASDR) plot from 1q21.1 deletion cultures after 100 days of differentiation. The culture was incubated with AP5 immediately before recording. **D** Example of an array-wide spike detection rate (ASDR) plot from 1q21.1 deletion cultures after 100 days of differentiation. The culture was incubated with CNQX immediately before recording. **E** Representative raster plot of neuronal activity exhibited by control and duplication-derived neurons at early (D60) neurodevelopmental stage. **F** The average number of spikes recorded per electrode at D60 of differentiation in control and duplication-derived neurons, there was no significant difference between the spike counts in both models.
