# Supplementary material for: Using induced pluripotent stem cells to investigate human neuronal phenotypes in 1q21.1 deletion and duplication syndrome
Source: PubMed Central journal article supplement (PMC9054650; doi:10.1038/s41380-021-01182-2), 2021-06-10
Supplement: 41380_2021_1182_MOESM12_ESM.pdf [file 41380_2021_1182_MOESM12_ESM.pdf]

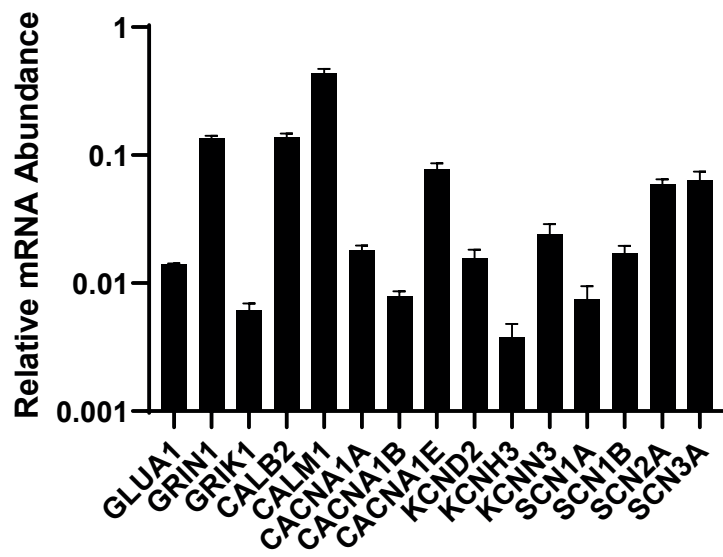

**Supp. Fig. 11: Gene expression of ion channels in control day 50 neurons.** Expression of common neuronal ion channels in day 50 control (average of both control,  $n \geq 3$ ) neuronal culures normalised to the expression of GAPDH.
