# Supplementary material for: Using induced pluripotent stem cells to investigate human neuronal phenotypes in 1q21.1 deletion and duplication syndrome
Source: PubMed Central journal article supplement (PMC9054650; doi:10.1038/s41380-021-01182-2), 2021-06-10
Supplement: 41380_2021_1182_MOESM13_ESM.pdf [file 41380_2021_1182_MOESM13_ESM.pdf]

**Supp. Table 1: Patient information for all 1q21.1 patients used in the study.** GAD: generalised anxiety disorder; MDD: major depressive; OCD: obsessive compulsive disorder; PD: personality disorder.

|               | Sex    | Full scale IQ | Clinical Symptoms                                                                                                                             | Medication  | 1q21.1 Mutation Coordinates | Other CNVs                                             |
|---------------|--------|---------------|-----------------------------------------------------------------------------------------------------------------------------------------------|-------------|-----------------------------|--------------------------------------------------------|
| Deletion 1    | male   | 77            | agoraphobia, avoidant PD, obsessive-compulsive PD, depressive PD, other substance-related disorder, conduct disorder                          | N/A         | chr1:146496661-147375981    | chr12:2027625-2550818_dup                              |
| Deletion 2    | female | 78            | Adjustment Disorder, cardiac: deformed valve, narrowing of aorta, thyroid problems, hearing difficulties, sleep apnoea                        | Citalopram  | chr1:146330584-147825662    | chr1:63918079-64038174_dup, chr5:19503096-19985234_del |
| Deletion 3    | male   | 109           | social phobia, OCD, MDD, avoidant PD; interstitial cystitis (daily catheterisation), short stature, recurrent infections; tremor              | Propranolol | chr1:146496661-147391614    |                                                        |
| Duplication 1 | female | 89            | social phobia, GAD, MDD, avoidant PD, conduct disorder, hearing difficulties                                                                  | N/A         | chr1:146330584-146982763    |                                                        |
| Duplication 2 | female | 109           | social phobia, panic disorder, agoraphobia, OCD, MDD, psychotic symptoms, schizotypal PD, Borderline PD; osteoarthritis, visual difficulties; | Propranolol | chr1:146330584-147825662    |                                                        |
