# Supplementary material for: Using induced pluripotent stem cells to investigate human neuronal phenotypes in 1q21.1 deletion and duplication syndrome
Source: PubMed Central journal article supplement (PMC9054650; doi:10.1038/s41380-021-01182-2), 2021-06-10
Supplement: 41380_2021_1182_MOESM14_ESM.pdf [file 41380_2021_1182_MOESM14_ESM.pdf]

**Supplementary Table 2: List of primers used in the study**

| Target        | Forward                       | Reverse                    |
|---------------|-------------------------------|----------------------------|
| BCL9          | GGCCATACCCCTAAAGCACTC         | CGGAAATACTTCGCTCCCTTTT     |
| CACNA1A       | CGCTTCGGAGACGAGATGC           | TGCGCCATTGACTGCTTGT        |
| CACNA1B       | GACAACGTCGTCCGCAAATAC         | CCCGATGAAATAGGGCTCCG       |
| CACNA1E       | AATGATGCCTTAGGAGCCACC         | AGCTCACGCTCAATCTGCTG       |
| CALB2         | AGCGCCGAGTTTATGGAGG           | TGGTTTGGGTGTATTCTGGA       |
| CALM1         | TTGACTTCCCCGAATTTTTGACT       | GGAATGCCTCACGGATTTCTT      |
| CHD1L         | GCTATGAGCGTGTGGATGGTT         | TGCTGTTAAGTTCATGCCAACTC    |
| CUX1          | GCTCTCATCGGCCAATCACT          | TCTATGGCCTGCTCCACGT        |
| DCX           | CCTTGGCTAGCAGCAACAGT          | CCACTGCGGATGATGGTAA        |
| ETV1          | CTGGATGACCCGGCAAATTCT         | CCTCTTCAGGCTCAATCAGTTT     |
| FOXP1         | AGACAAAAGTAACGGTTCAGCC        | CGCACTCTAGTAAGTGGTTGC      |
| GFAP          | AGGTCCATGTGGAGCTTGAC          | GCCATTGCCTCATACTGCGT       |
| GAPDH         | CTGGTAAAGTGGATATTGTTGCCA<br>T | TGGAATCATATTGGAACATGTAACC  |
| GLUA1         | CGAGCTTTCCCGTTGATACAT         | TCTGCCACTTGTAATGGTCAATG    |
| GPR89B        | GGAGTGACTCTCATGGCTCTT         | TGTTATGCACTTCCCCCTTCT      |
| GRIK1         | TCCTCTGCTATATCCTCCCTCA        | CATCAGGGTTCGGTTTCTGTTA     |
| GRIN1         | CTACCGCATACCCGTGCTG           | GCATCATCTCAAACCACACGC      |
| KCND2         | GGGTTTTTCATTGCCGTCTCT         | CACAGCATACCCGCTCTCCA       |
| KCNH3         | TGGACGAGCACAAGGAGTTC          | CGGTTCTTGGTTTCGCTGATG      |
| KCNN3         | GCCTTCTCCTACACACCCTC          | CTCGGGCGATCAGGTACAG        |
| MAP2          | CTGCTTTACAGGGTAGCACAA         | TTGAGTATGGCAAACGGTCTG      |
| NESTIN        | TCCAGAAACTCAAGCACCA           | AAATTCTCCAGGTTCCATGC       |
| NOTCH2NL      | TGAGCCTTTGAAGCAGGAGG          | AGATCCACATGGGGAGGGG        |
| Pax6          | CAACTCCATCAGTTCCAACG          | TGGATAATGGGTTCTCTCAAACCTCT |
| PRKAB2        | ATGCGTTTTCGATCTGAGGAAAG       | GGTTCAGCATAACATGGTTGGG     |
| PSD95         | AGCCCAGGATATGAGTTGC           | GATGTGTGGGTTGTCAGTGC       |
| REELIN        | TCCGGGACAAGAATACCATGT         | CCAAATCCGAAAGCACTGGAA      |
| S100B         | TGGCCCTCATCGACGTTTTTC         | ATGTTCAAAGAACTCGTGGCA      |
| SATB2         | CCGCACACAGGGATTATTGTC         | TCCACTTCAGGCAGGTTGAG       |
| SCN1A         | ATGTGGAAATAGCTCTGATGCAG       | AGCCCAACTGAAGGTATCAAAG     |
| SYNAPTOPHYSIN | TGGTGTTCCGGCTTCTGAA           | GCGGCCAGCCTGTCT            |
| TUJ1          | CATGGACAGTGTCCGCTCAG          | CAGGCAGTCGCAGTTTTTAC       |
