# Supplementary material for: Using induced pluripotent stem cells to investigate human neuronal phenotypes in 1q21.1 deletion and duplication syndrome
Source: PubMed Central journal article supplement (PMC9054650; doi:10.1038/s41380-021-01182-2), 2021-06-10
Supplement: 41380_2021_1182_MOESM15_ESM.pdf [file 41380_2021_1182_MOESM15_ESM.pdf]

**Supplementary Table 3: List of antibodies used in the study.**

| Target        | Supplier (code)        | Host   | Dilution       |
|---------------|------------------------|--------|----------------|
| Oct4          | CellSignalling (C30A3) | Rabbit | 1:400          |
| Sox2          | CellSignalling (D6D9)  | Rabbit | 1:400          |
| Nanog         | CellSignalling (D73G4) | Rabbit | 1:200          |
| MAP2          | R and D (MAB8304)      | Mouse  | 1:1000         |
| TBR1          | Abcam (Ab31940)        | Rabbit | 1:200 - 1:1000 |
| TUJ1          | Sigma (T8578)          | Mouse  | 1:500          |
| CTIP2         | Abcam (Ab18465)        | Rat    | 1:200 - 1:1000 |
| MAP2          | Abcam (Ab32454)        | Rabbit | 1:1000         |
| Synaptophysin | Abcam (Ab32127)        | Rabbit | 1:500          |
| GAPDH         | Abcam (ab9485)         | Rabbit | 1:5000         |
| PSD95         | Abcam (ab76115)        | Rabbit | 1:1000         |
| Ki67          | Abcam (ab15580)        | Rabbit | 1:1000         |
| Nestin        | Abcam (ab105389)       | Rabbit | 1:300          |
