# Supplementary material for: Using induced pluripotent stem cells to investigate human neuronal phenotypes in 1q21.1 deletion and duplication syndrome
Source: Mol Psychiatry. 2021 Jun 10;27(2):819–30. doi: 10.1038/s41380-021-01182-2 (PMC9054650; doi:10.1038/s41380-021-01182-2)
Supplement: Supplementary file 8 — Supplementary Figure 7 [file 41380_2021_1182_MOESM8_ESM.pdf]

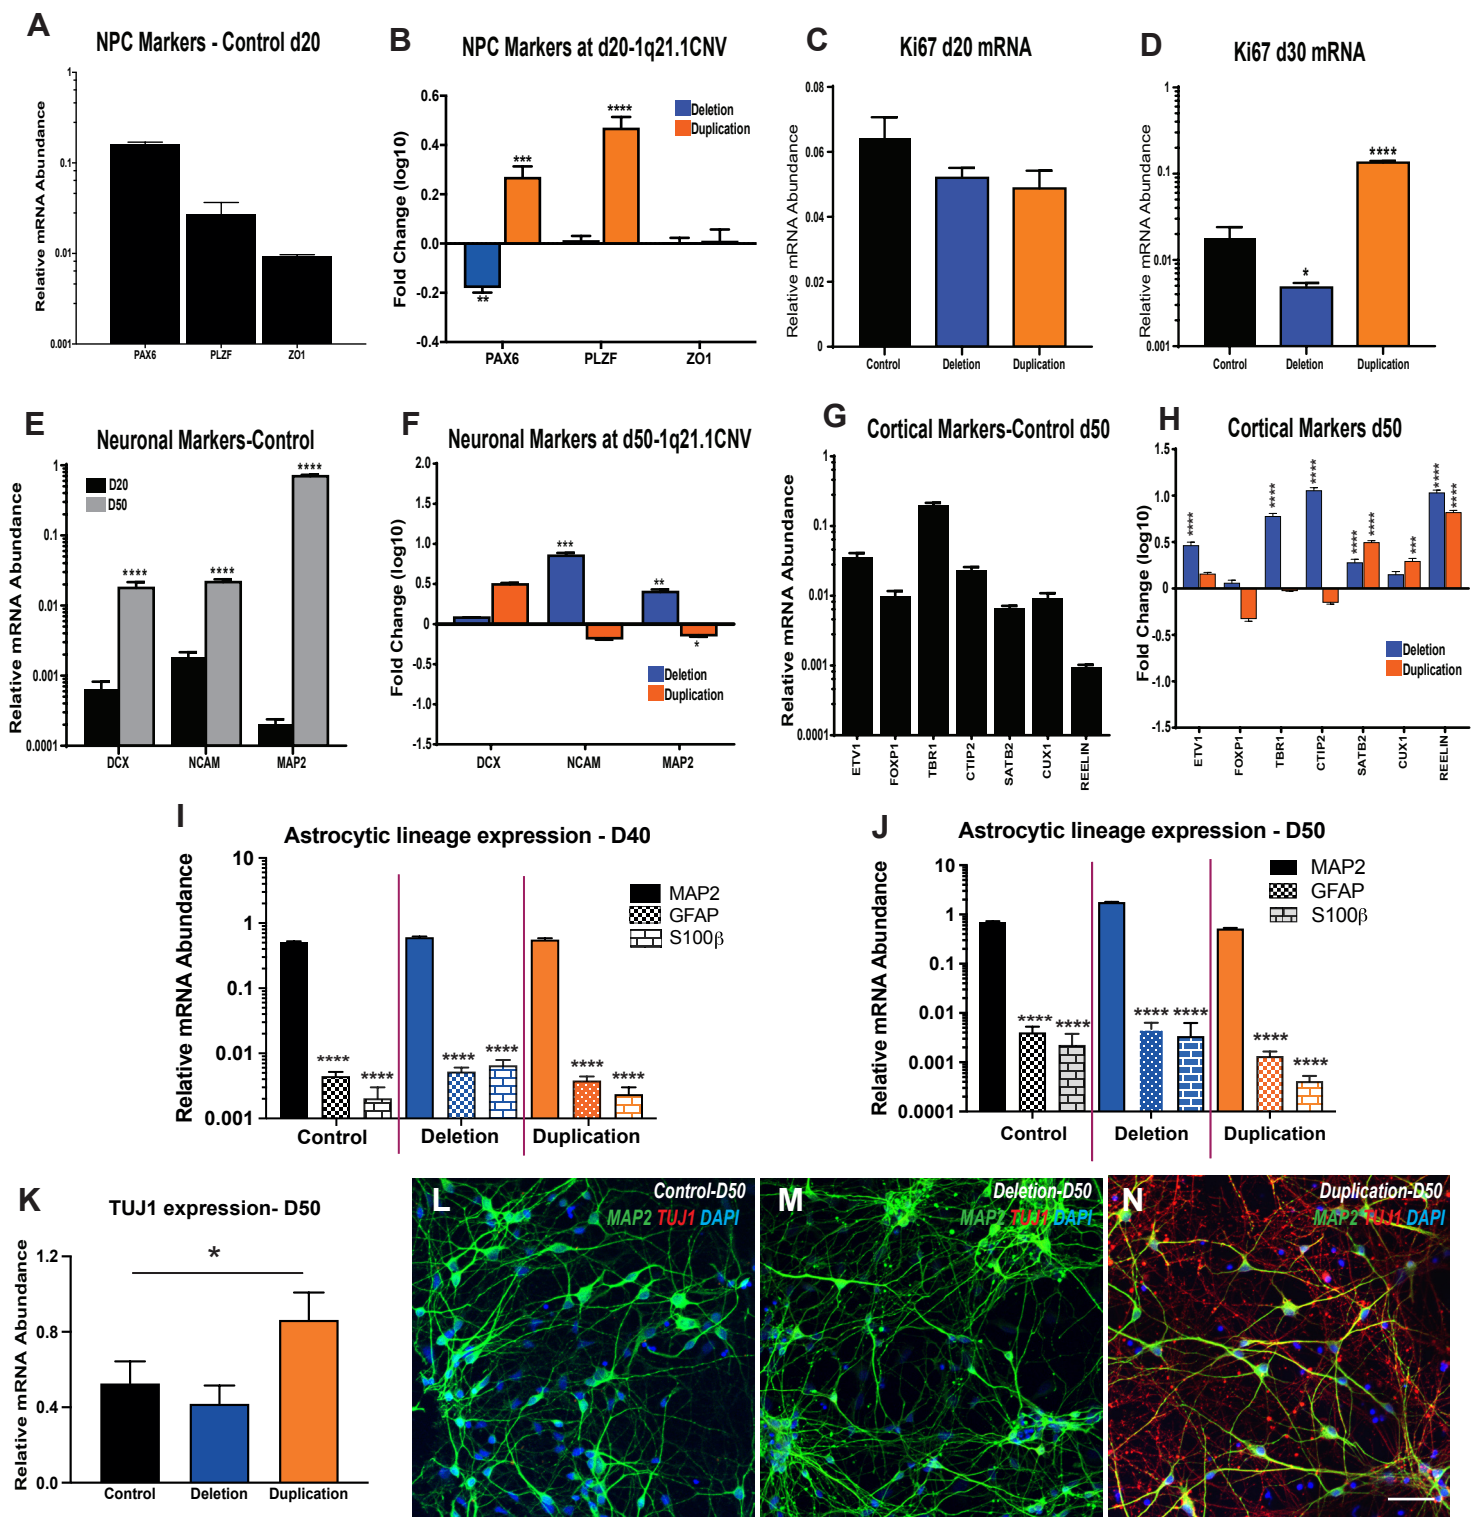

**Supp. Fig. 7: Characterization of iPSC derived neurons with and without 1q21.1 CNV .** **A** The expression of NESTIN (NES), PLZF and ZO1 mRNA at day 20 and 50 of neuronal differentiation. The time point samples were taken had a significant effect on expression of the three markers (Control n=3,  $F_{1,30}=23.2$ ;  $P<0.0001$ ; ). **B** Fold change of NPC markers in 1q21.1 deletion and duplication cell lines after 20 days of differentiation. Data was analyzed using multiple T-Tests. Stars represent Holm-Sidak corrected p-values. **C,D** Expression of Ki67 mRNA after 20 and 30 days of neuronal differentiation (n≥3). **E** The expression of DCX, NCAM and MAP2 mRNA at day 20 and 50 of neuronal differentiation. The time point samples were taken had a significant effect on expression of the three markers (Control n=3;  $F_{1,30}=98.4$ ;  $P<0.0001$ ). Data sets were analyzed by two-way ANOVA with post hoc comparisons comparing to day 20 samples. Stars above points represent Sidak-corrected post hoc tests. **F** Fold change of neuronal markers in 1q21.1 deletion and duplication cell lines after 50 days of differentiation. Data was analyzed using multiple T-Tests. Stars represent Holm-Sidak corrected p-values. **G** Expression of cortical layer markers in control day 50 cultures (n=3). **H** Expression of cortical layer markers in 1q21.1 deletion and duplication day 50 cultures (n=3). Fold change is normalized to control day 50 differentiations. Data was analyzed using multiple T-Tests. Stars represent Holm-Sidak corrected p-values. All data presented as means  $\pm$  SEM, \* $P<0.05$ , \*\*\* $P<0.001$ , \*\*\*\* $P<0.0001$ . **I** The expression of GFAP and S100 $\beta$  was significantly minimal in comparison to MAP2 in D40 neuronal cultures. The level of GFAP and S100 $\beta$  was comparable across the experimental group. **J** Similarly, the expression of GFAP and S100 $\beta$  in comparison to MAP2 was significantly reduced in D50 neuronal cultures (n=3). Data was analysed using Students T-Tests. **K** Bar graph showing level of TUJ1 expression across group at day 50. All data presented as means  $\pm$  SEM, n=3, \* $P<0.05$ , One way ANOVA, Dunnet multiple comparison between group was not significant. **L-N** Representative confocal fluorescence images of neurons across groups co-immunostained for MAP2 (green) and TUJ1 (red) after 50 days of differentiation. Nuclei were counterstained by DAPI (blue). Scale bar: 50 $\mu$ m.
